# Supplementary material for: Interpreting Pharmaceutical Policy Change in Iran: A Qualitative Multiple Streams Analysis of the Darooyar Reform Under Sanctions
Source: Research Square preprint supplement (doi:10.21203/rs.3.rs-7631927/v1), 2025-10-10
Supplement: Supplementary file 1 [file 3f2f9e48a86719f7da4544f1.docx]

i**nterview Guide**

**Policy Analysis of the *Darooyar* Plan Based on Kingdon’s Multiple Streams Framework**

**Introduction**

Thank you for taking the time to participate in this study. The purpose of this research is to analyze the *Darooyar* pharmaceutical subsidy reform in Iran using Kingdon’s Multiple Streams Framework. The questions are designed to capture your perspectives on the problem stream, the policy stream, and the politics stream. Your answers will remain confidential and will only be used for academic purposes.

Part I: General Information

1. **What is your professional background?**

- Physician
- Pharmacist
- Manager or expert in the pharmaceutical sector
- Insurance expert
- Policy-maker or government official
- Health economics / pharmaceutical economics
- Other (please specify): …

2. **How many years of experience do you have in the health or pharmaceutical sector?**

- Less than 5 years
- 5–10 years
- More than 10 years

3. **What is your main place of work?**

- Hospital / healthcare center
- Pharmacy
- Health insurance organization
- Ministry of Health or university of medical sciences
- Pharmaceutical industry
- Other (please specify): …

p**art II: Current Situation of the *Darooyar* Plan (Problem Stream)**

- To what extent has the *Darooyar* plan been effective in controlling out-of-pocket drug expenditures for patients? (1 = Not at all, 5 = Completely)
  **Your score:** …
  **Additional explanation:** …
- To what extent have insurance coverage and financial protection contributed to the implementation of *Darooyar*? (1–5)
  **Your score:** …
  **Additional explanation:** …
- To what extent has the implementation of *Darooyar* supported the domestic pharmaceutical industry? (1–5)
  **Your score:** …
  **Additional explanation:** …
- According to the 2022 Audit Court report, the allocated budget for drug subsidies was only 49% of what had been legislated, while subsidies for bread exceeded 200% of predictions. In your opinion, to what extent has the Targeted Subsidy Organization played a positive or negative role in the *Darooyar* implementation? (1 = Very negative, 5 = Very positive)
  **Your score:** …
  **Additional explanation:** …
- In your view, what are the main root causes of liquidity challenges in the pharmaceutical industry? (You may choose more than one option):
  - Price controls in the pharmaceutical sector
  - Conflict of interest between regulators and industry
  - Gap between predicted and allocated budgets / lack of sustainable financing
  - Non-transparent and complex financial allocation processes in the health sector
  - Inefficiency of managers in governmental and semi-governmental pharmaceutical bodies
  - International sanctions and banking restrictions
  - Lack of sufficient monitoring in the supply and distribution chain
  - Government debt to insurers and delays in insurance reimbursement
  - Barriers to obtaining bank loans for the pharmaceutical industry
  - Poor inter-sectoral coordination (insurance organizations, central bank, budget office, subsidy organization, etc.)
  - Lack of comprehensive health policies (e.g., family physician and referral system)
  - Other (please specify): …

p**art III: Policy Options and Recommendations (Policy Stream)**

**A. Level of agreement with the following policy options (1 = Not at all, 5 = Completely):**

- Increasing transparency in financial flows and allocation of pharmaceutical resources
- Establishing a sustainable financial fund for insurers with support from the Central Bank and innovative financial tools
- Debt offsetting between governmental, public, and private entities
- Strengthening electronic monitoring of the entire pharmaceutical supply, distribution, and prescription chain
- Integration of insurance, pharmacy, and Ministry of Health information systems to reduce errors and corruption
- Reforming price-setting mechanisms and introducing financial incentives to improve product quality
- Targeted support for domestic pharmaceutical manufacturers and enhancing GMP standards for global competitiveness
- Promoting public health literacy and rational use of medicines
- Strengthening health diplomacy for importing raw materials and promoting pharmaceutical exports
- Increasing participation of civil society organizations and patient associations

**B. In your opinion, what additional strategies are needed to address the challenges of *Darooyar* and improve its effectiveness?**

**C. How familiar are you with financial instruments such as “GAM bonds” or factoring services (selling and discounting debts to banks)? Do you think these tools could help address liquidity challenges in *Darooyar*? What conditions are necessary for their effective use?**

**Part IV: Political and Institutional Context (Politics Stream)**

- When the *Darooyar* reform was launched, the official drug exchange rate was set at 28,500 IRR/USD, while the market rate was around 30,000 IRR/USD. Currently (August 2025), the market rate has exceeded 90,000 IRR/USD, while the official rate for pharmaceuticals remains 28,500 IRR/USD. How do you evaluate this gap? Has *Darooyar* become ineffective in practice? What policies should be adopted to strengthen it?

**closing Note**

Thank you very much for your time and valuable insights. Your participation will help us better understand the strengths, weaknesses, and future directions of the *Darooyar* policy.
